# Supplementary material
Source: publisher figshare collection journal article supplement (https://acs.figshare.com/ndownloader/files/5692773)
Supplement: Supplementary file 1 [file 5692773]

## Supporting Information

### A New High Yield Synthesis of $\text{Cl}_3\text{P}=\text{NSiMe}_3$ , a Monomeric Precursor for the Controlled Preparation of High Molecular Weight Polyphosphazenes

Bin Wang, Eric Rivard, and Ian Manners\*

Department of Chemistry, University of Toronto, 80 St. George Street, Toronto, Ontario, Canada M5S 3H6

## Experimental Section

**Materials and Equipment.**  $\text{LiN}(\text{SiMe}_3)_2$  (Aldrich, 97 %) was used as received.  $\text{SO}_2\text{Cl}_2$  (Aldrich, 97 %) and  $\text{PCl}_3$  (BDH, 98 %) were distilled before use. Pentane was stirred over  $\text{CaH}_2$  overnight and distilled prior to use. All glassware was flame dried under vacuum before use. The reactions were performed using standard Schlenk techniques or in a glove box (Innovative Technology) under an atmosphere of prepurified nitrogen (Matheson).

$^{31}\text{P}\{^1\text{H}\}$  and  $^1\text{H}$  spectra (in  $\text{CDCl}_3$ ) were recorded on a Varian Mercury 300 NMR spectrometer operated at 121.4 and 300.0 MHz, respectively.  $^1\text{H}$  NMR spectra were referenced to protio impurities in the solvent, while  $^{31}\text{P}$  NMR chemical shifts were externally referenced to 85 % phosphoric acid.

**Alternate Procedure for the Preparation of  $\text{Cl}_3\text{P}=\text{NSiMe}_3$  in Pentane.**  $\text{LiN}(\text{SiMe}_3)_2$  (4.94 g, 29.5 mmol) was dissolved in 100 mL of pentane and the solution was cooled to 0 °C.  $\text{PCl}_3$  (2.5 mL, 29 mmol) was then added dropwise over 10 min. The resulting mixture was stirred for 30 min at the same temperature giving a white suspension.  $^{31}\text{P}\{^1\text{H}\}$  NMR revealed complete conversion of  $\text{PCl}_3$  ( $\delta = 221$  ppm) to  $\text{Cl}_2\text{PN}(\text{SiMe}_3)_2$  ( $\delta = 189$  ppm).  $\text{SO}_2\text{Cl}_2$  (2.5 mL, 31 mmol) was then added dropwise over 10 min to the above mentioned suspension at 0 °C. The reaction was allowed to proceed for 30 min at 0 °C and  $\text{Cl}_3\text{P}=\text{NSiMe}_3$  ( $\delta = -53.0$  ppm) was the only product present by  $^{31}\text{P}\{^1\text{H}\}$  NMR. The mixture was then filtered through Celite (dried at ~120 °C for > 48 h prior to use), which was then washed with pentane (2 x 20 mL). The volatiles from the resulting pale yellow filtrate were removed under reduced pressure (20 mm Hg, 0 °C)<sup>1</sup> to give a yellow liquid.  $\text{Cl}_3\text{P}=\text{NSiMe}_3$  was isolated (5.49 g, 85 %) as a colorless liquid by distilling the remaining residue under static vacuum (*ca.* 25 °C, *ca.* 0.1 mm Hg). The

resulting product contained trace quantities of  $\text{ClSiMe}_3$  ( $\delta = 0.44$  ppm,  $< 1\%$ ) as determined by  $^1\text{H}$  NMR spectroscopy [ $\delta$  for  $\text{Cl}_3\text{P=NSiMe}_3$ , 0.18 ppm (d,  $^4J_{\text{HP}} = 1.1$  Hz)].

References:

(1) For a reduced pressure set-up, please refer to: Krell, E. *Handbook of Laboratory Distillation*; Lumb, E. C., Ed.; Elsevier Publishing Company: New York, 1963; Fig. 381, page 470.
